# Supplementary material for: Does an intrinsic strain contribute to the effect of quantum confinement phenomenon? An alloyed transition metal dichalcogenide series, Mo(S1−xSex)2 as a case study
Source: Royal Society of Chemistry journal article supplement (doi:10.1039/d3nr06107h), 2024-01-01
Supplement: d3nr06107h1.pdf [file d3nr06107h1.pdf]

Electronic supplementary information (ESI)

Does an intrinsic strain contribute to the effect of quantum confinement phenomenon?  
An alloyed transition metal dichalcogenide series,  $\text{Mo}(\text{S}_{1-x}\text{Se}_x)_2$  as a case study

Arpan Bera,<sup>1</sup> Biswajit Kundu,<sup>1</sup> and Amlan J. Pal<sup>1,2,\*</sup>

<sup>1</sup>School of Physical Sciences, Indian Association for the Cultivation of Science, Kolkata 700032, India

<sup>2</sup>UGC-DAE Consortium for Scientific Research, University Campus, Khandwa Road, Indore 452001, India

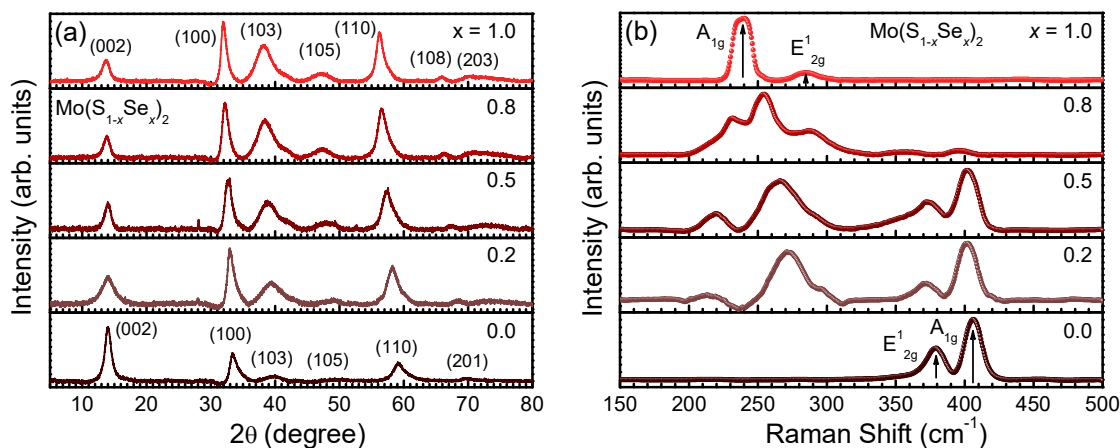

Fig. S1 (a) XRD patterns and (b) Raman spectra of  $\text{Mo}(\text{S}_{1-x}\text{Se}_x)_2$  alloyed-TMDs for different contents of selenium.

E-mail: sspajp@iacs.res.in

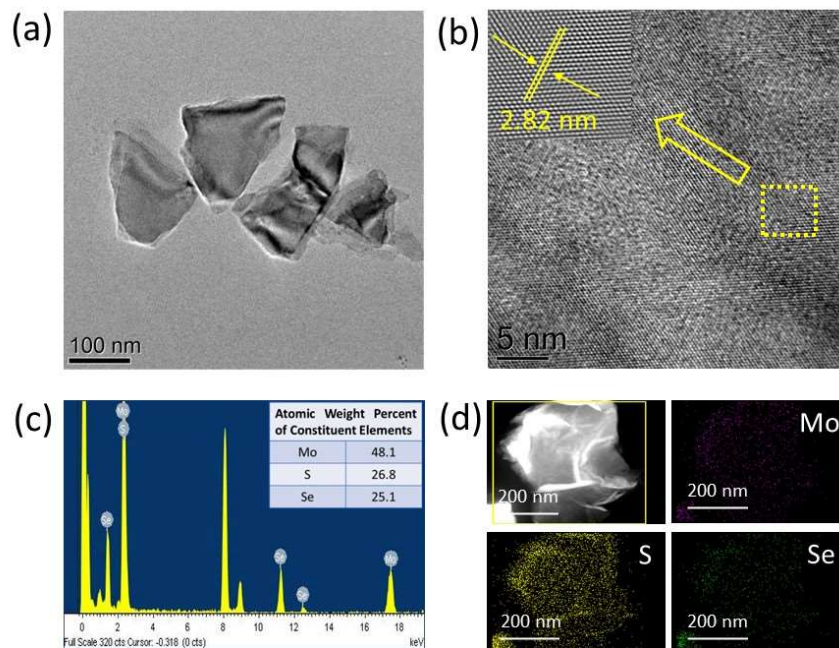

**Fig. S2** (a) TEM and (b) HR-TEM micrographs and (c) corresponding EDX spectra of  $\text{Mo}(\text{S}_{0.5}\text{Se}_{0.5})_2$  nanoflakes. (d) The elemental mapping of the compound in a nanoflake.

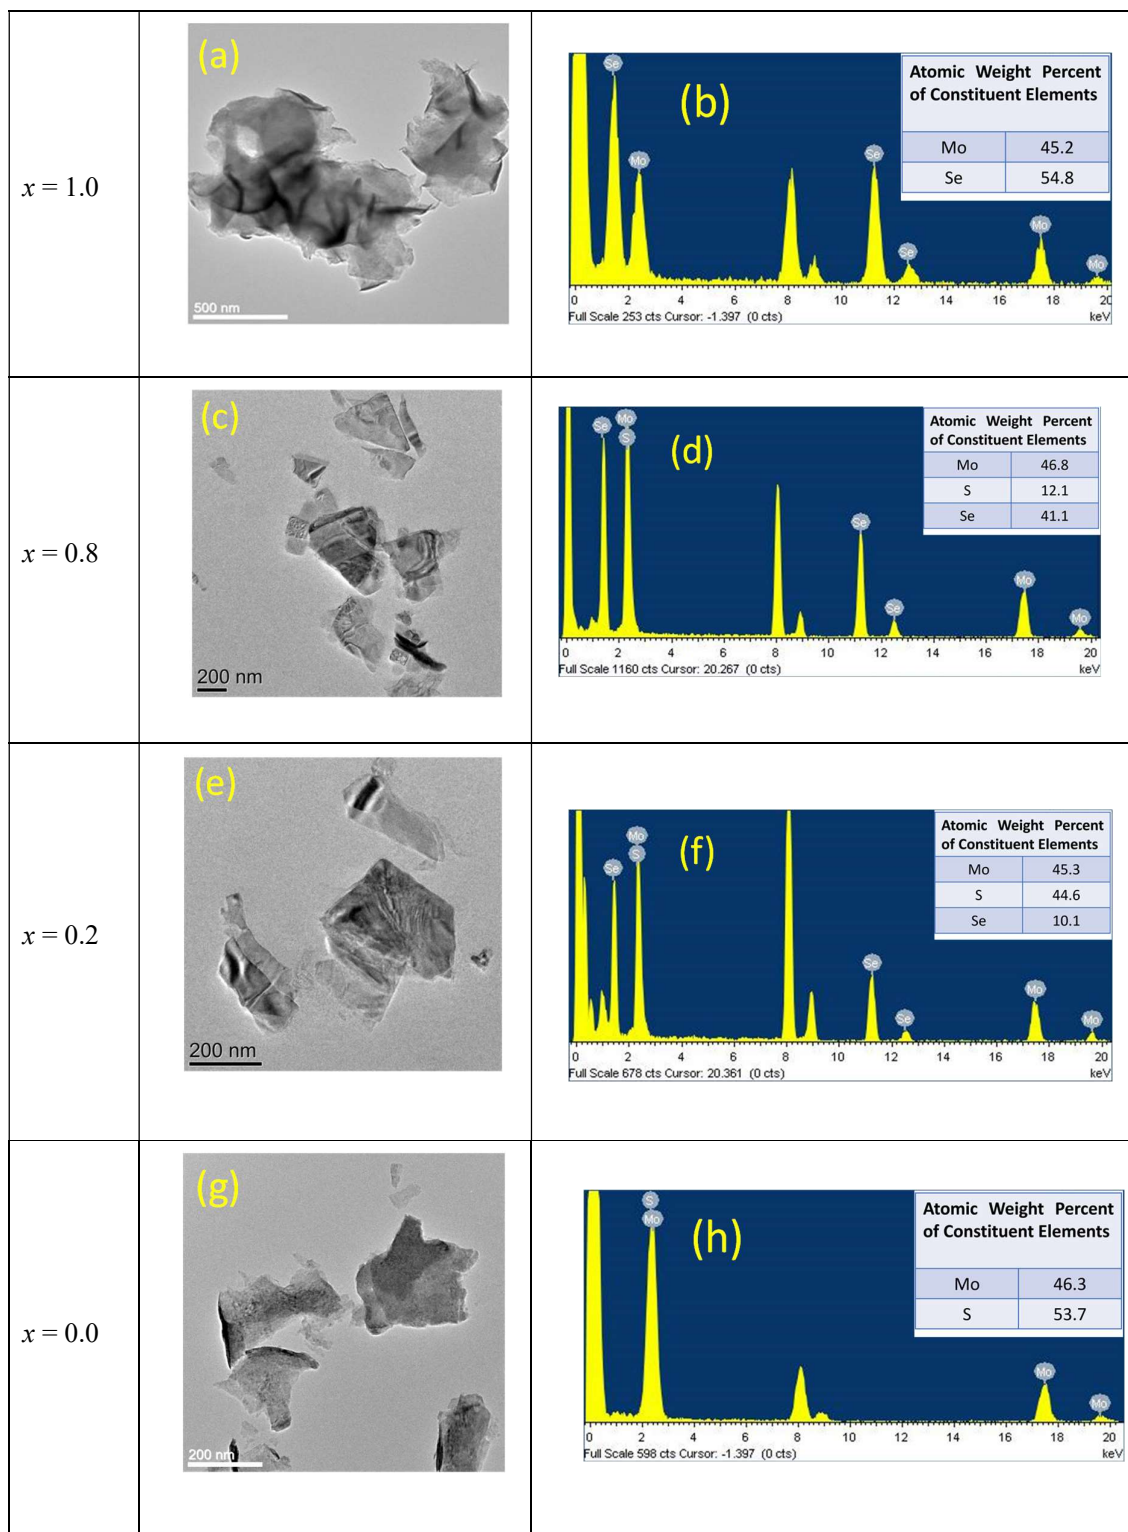

**Fig. S3** TEM images and EDX spectra of  $\text{Mo}(\text{S}_{1-x}\text{Se}_x)_2$  nanosheets showing the atomic percentages of the constituent elements.

**Table S1.** The targeted elemental composition used during the hydrothermal synthesis method vis-à-vis the results obtained from the EDX analyses of the TMD alloys.

| $x$ in the Targeted TMD<br>$\text{Mo}(\text{S}_{1-x}\text{Se}_x)_2$ | Atomic Percentage |        |          |
|---------------------------------------------------------------------|-------------------|--------|----------|
|                                                                     | Molybdenum        | Sulfur | Selenium |
| 0.2                                                                 | 45.3              | 44.6   | 10.1     |
| 0.5                                                                 | 48.1              | 26.8   | 25.1     |
| 0.8                                                                 | 46.8              | 12.1   | 41.1     |

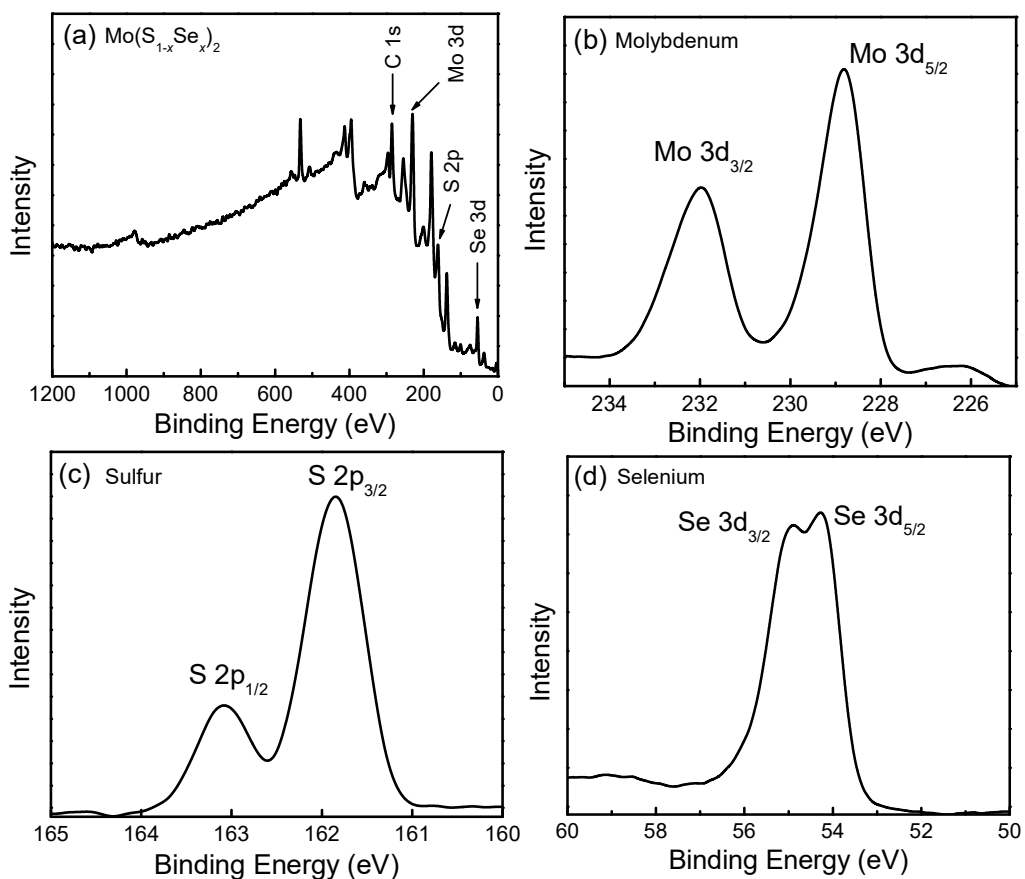

**Fig. S4** (a) Full range XPS spectrum of  $\text{Mo}(\text{S}_{1-x}\text{Se}_x)_2$  (with selenium content,  $x = 0.5$ ) and the high-resolution spectra of (b) Mo 3d, (c) S 2p, and (d) Se 3d states.

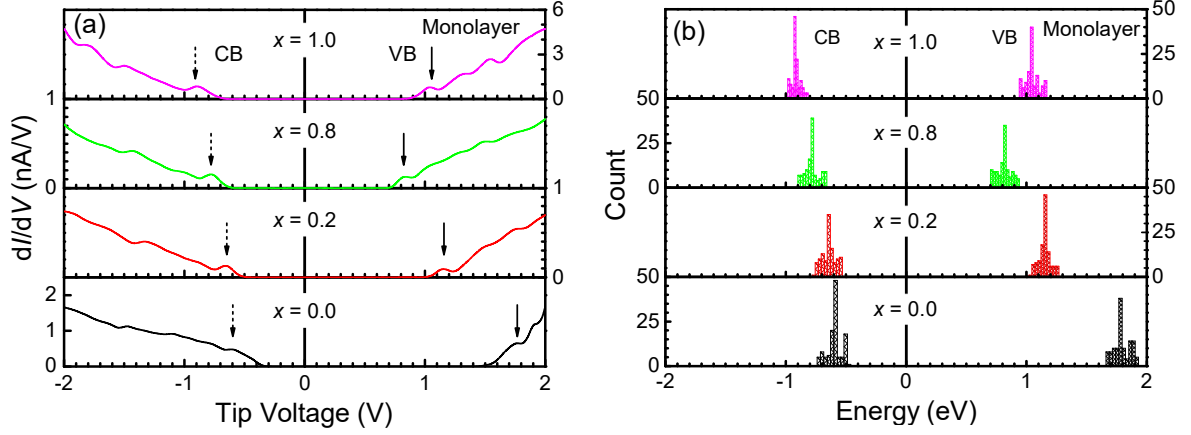

**Fig. S5** (a)  $dI/dV$  spectra and (b) histogram of the CB and the VB energies with respect to Fermi level ( $E_F$ ) for a monolayer of different alloyed-TMDs.

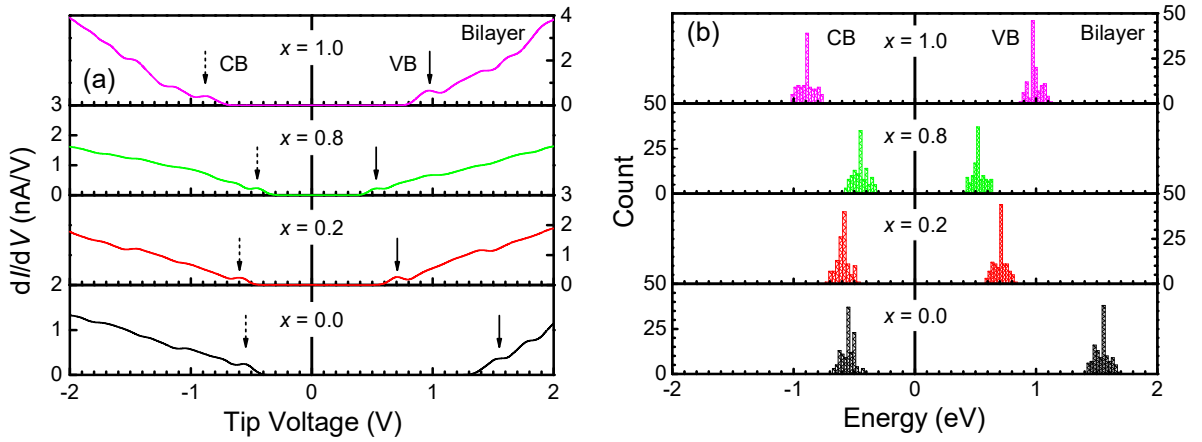

**Fig. S6** (a)  $dI/dV$  spectra and (b) histogram of the CB and the VB energies with respect to Fermi level ( $E_F$ ) for a bilayer of different alloyed-TMDs.

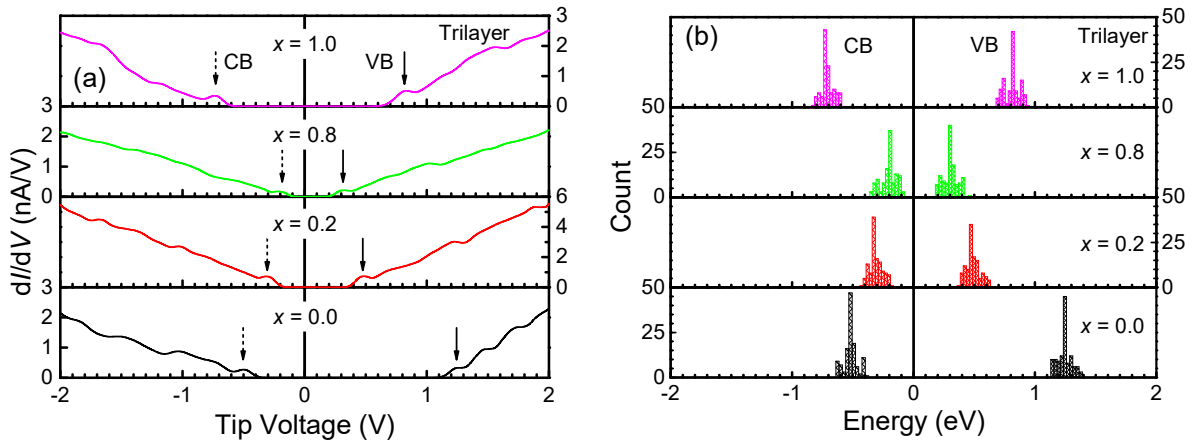

**Fig. S7** (a)  $dI/dV$  spectra and (b) histogram of the CB and the VB energies with respect to Fermi level ( $E_F$ ) for a trilayer of different alloyed-TMDs.

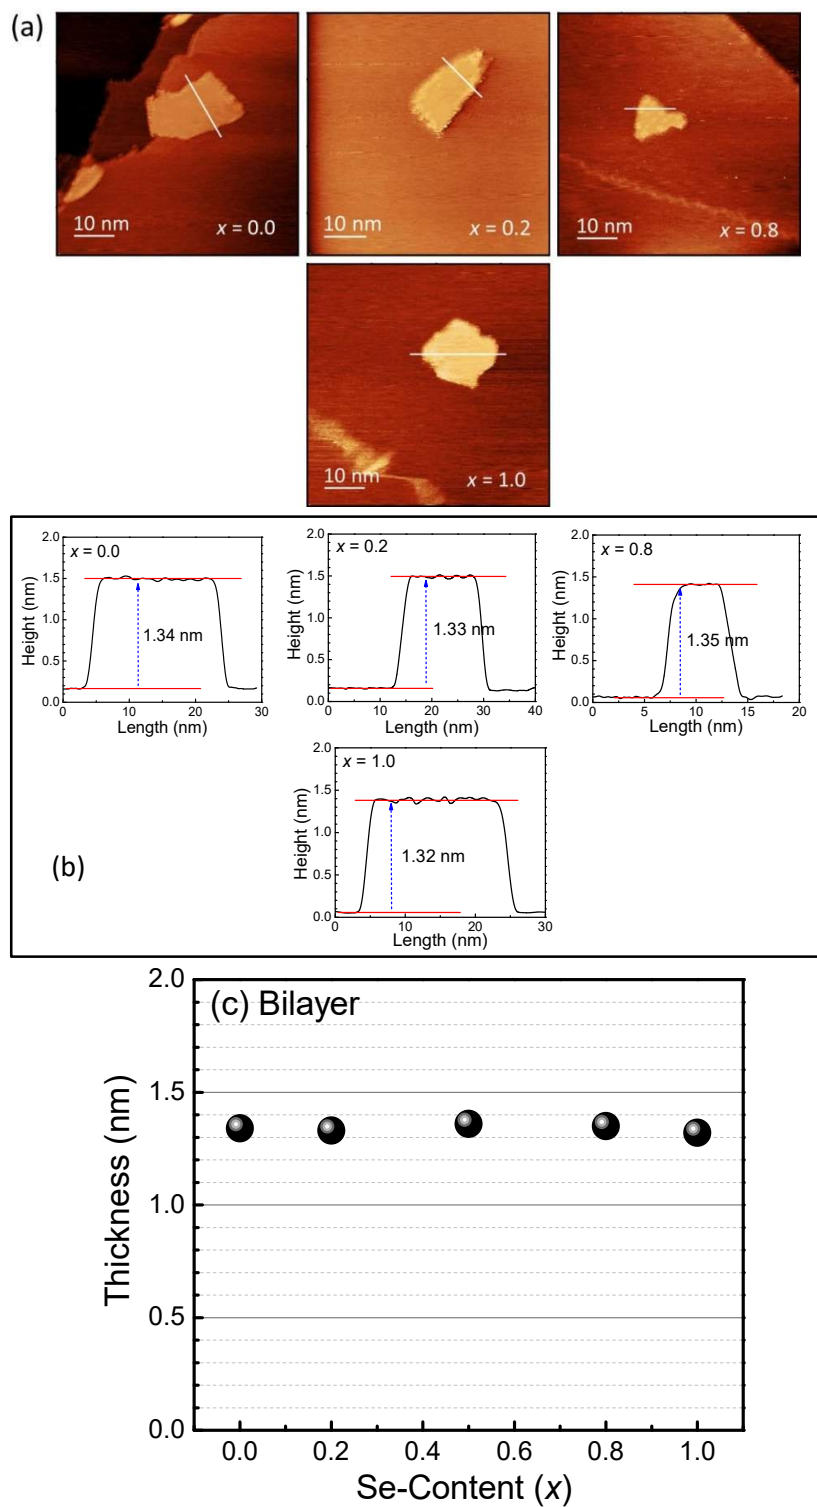

**Fig. S8** (a) STM topographies and (b) the line profiles on the topographies of  $\text{Mo}(\text{S}_{1-x}\text{Se}_x)_2$  in their bilayer-form. (c) Thickness of a bilayer as a function of the selenium content in the alloyed-TMDs.

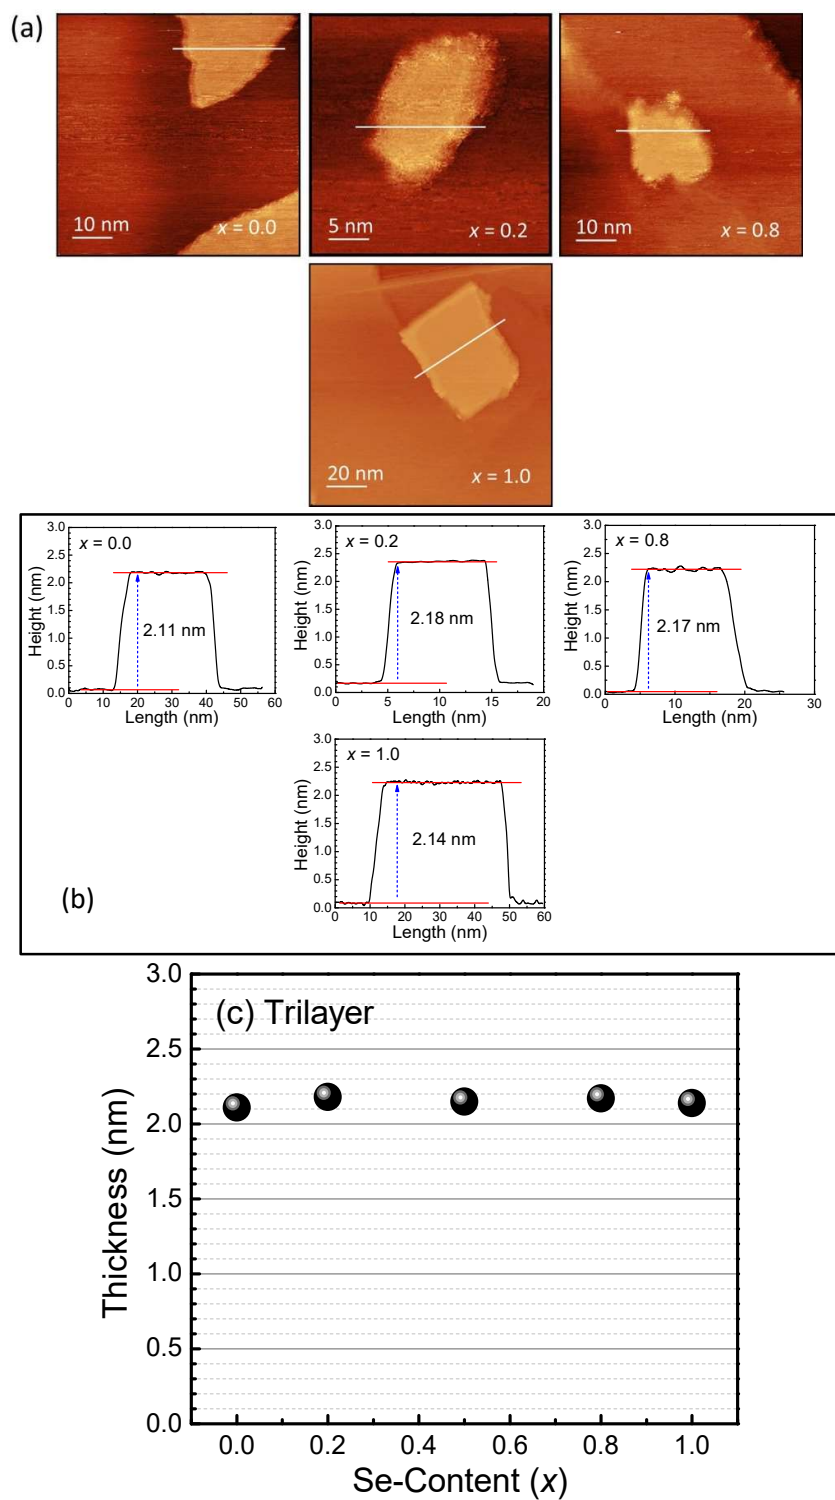

**Fig. S9** (a) STM topographies and (b) the line profiles on the topographies of  $\text{Mo}(\text{S}_{1-x}\text{Se}_x)_2$  in their trilayer-form. (c) Thickness of a trilayer as a function of the selenium content in the alloyed-TMDs.
